Articles of interest in other COB journals

From *Journal of Cell Science*

**Regulation of transient receptor potential canonical channel 1 (TRPC1) by sphingosine 1-phosphate in C2C12 myoblasts and its relevance for a role of mechanotransduction in skeletal muscle differentiation**

Lucia Formigli, Chiara Sassoli, Roberta Squecco, Francesca Bini, Maria Martinesi, Flaminia Chellini, Giorgia Luciani, Francesca Sbrana, Sandra Zecchi-Orlandini, Fabio Francini and Elisabetta Meacci

Formigli, L. et al. 2009. *J. Cell Sci.* doi:10.1242/jcs.035402

**Dpp signaling promotes the cuboidal-to-columnar shape transition of *Drosophila* wing disc epithelia by regulating Rho1**

Thomas J. Widmann and Christian Dahmann

Widmann, T. J. and Dahmann, C. 2009. *J. Cell Sci.* doi:10.1242/jcs.044271
